# Supplementary material
Source: PubMed Central journal article supplement (PMC10900966)
Supplement: jama-e240179-s002.pdf [file jama-e240179-s002.pdf]

\*Indicates required information. Only first name, last name, and suffix will appear in PubMed.

| <b>*Group Name(s): The Society of Critical Care Medicine Pediatric Sepsis Definition Task Force</b> |                   |                              |                  |                                    |                                          |                                                         |                                                                                            |
|-----------------------------------------------------------------------------------------------------|-------------------|------------------------------|------------------|------------------------------------|------------------------------------------|---------------------------------------------------------|--------------------------------------------------------------------------------------------|
| <b>*First Name and Middle Initial(s)</b>                                                            | <b>*Last Name</b> | <b>*Suffix (eg, Jr, III)</b> | Academic Degrees | Institution                        | Location (city, state/province, country) | Role or Contribution, eg, chair, principal investigator | Group (if more than 1 Group listed in the byline and/or Subgroup (eg, Steering Committee)) |
| Juliane                                                                                             | Bubeck Wardenburg |                              | MD, PhD          | Washington Univeristy in St. Louis | St. Louis, MO, USA                       | Task force member                                       | Pediatric Sepsis Definitions Task Force                                                    |
