# Supplementary material
Source: PubMed Central journal article supplement (PMC10900966)
Supplement: jama-e240179-s003.pdf [file jama-e240179-s003.pdf]

## Data Sharing Statement

Schlapbach. International Consensus Criteria for Pediatric Sepsis and Septic Shock. *JAMA*.  
Published January 21, 2024. doi:10.1001/jama.2024.0179

### Data

**Data available:** No

### Additional Information

**Explanation for why data not available:** The data that informed the consensus recommendations are presented in a separate manuscript with a specific dissemination plan.
